# Supplementary material for: Construction of d10 metal coordination polymers based on in situ formed 3,5-di(1H-1,2,4-triazol-1-yl)benzoic acid from different precursors: influence of in situ hydrolysis reactions on assembly process
Source: Royal Society of Chemistry journal article supplement (doi:10.1039/c8ce01233d), 2018-01-01
Supplement: c8ce01233d1.pdf [file c8ce01233d1.pdf]

## Construction of d<sup>10</sup> metal coordination polymers based on *in situ* formed 3,5-di(1H-1,2,4-triazol-1-yl)benzoic acid from different precursors: influence of *in situ* hydrolysis reactions on assembly process

Shu-Qi Deng,<sup>a</sup> Xiao-Jing Mo,<sup>a</sup> Yin Feng,<sup>a</sup> Song-Liang Cai,<sup>\* a</sup> Wei-Guang Zhang,<sup>a</sup> Sheng-Run Zheng,<sup>\* ab</sup>

### Supporting information

Table S1 Selected bond lengths [Å] and angles[°] for the compounds 1-7.<sup>a</sup>

| Compound 1          |            |                     |            |
|---------------------|------------|---------------------|------------|
| Zn(1)-O(1)          | 1.9415(15) | Zn(1)-N(6)#1        | 1.9975(17) |
| Zn(1)-O(3)          | 1.9445(16) | Zn(1)-N(3)#2        | 2.0372(17) |
| O(1)-Zn(1)-O(3)     | 106.47(7)  | O(1)-Zn(1)-N(3)#2   | 96.18(7)   |
| O(1)-Zn(1)-N(6)#1   | 120.24(8)  | O(3)-Zn(1)-N(3)#2   | 112.13(7)  |
| O(3)-Zn(1)-N(6)#1   | 115.48(7)  | N(6)#1-Zn(1)-N(3)#2 | 104.67(7)  |
| Compound 2          |            |                     |            |
| Cd(1)-O(2)          | 2.282(3)   | Cd(1)-N(6)#3        | 2.395(3)   |
| Cd(1)-O(2)#1        | 2.282(3)   | Cd(1)-N(1)#4        | 2.444(3)   |
| Cd(1)-N(6)#2        | 2.395(3)   | Cd(1)-N(1)#5        | 2.444(3)   |
| O(2)-Cd(1)-O(2)#1   | 180        | N(6)#2-Cd(1)-N(1)#4 | 88.54(11)  |
| O(2)-Cd(1)-N(6)#2   | 89.16(14)  | N(6)#3-Cd(1)-N(1)#4 | 91.46(11)  |
| O(2)#1-Cd(1)-N(6)#2 | 90.84(14)  | O(2)-Cd(1)-N(1)#5   | 103.22(12) |
| O(2)-Cd(1)-N(6)#3   | 90.84(14)  | O(2)#1-Cd(1)-N(1)#5 | 76.78(12)  |
| O(2)#1-Cd(1)-N(6)#3 | 89.16(14)  | N(6)#2-Cd(1)-N(1)#5 | 91.46(11)  |
| N(6)#2-Cd(1)-N(6)#3 | 180        | N(6)#3-Cd(1)-N(1)#5 | 88.54(11)  |
| O(2)-Cd(1)-N(1)#4   | 76.78(12)  | N(1)#4-Cd(1)-N(1)#5 | 180        |
| O(2)#1-Cd(1)-N(1)#4 | 103.22(12) |                     |            |
| Compound 3          |            |                     |            |
| Cd(1)-O(3)#1        | 2.282(4)   | Cd(1)-O(4)#3        | 2.320(4)   |
| Cd(1)-O(2)#2        | 2.288(4)   | Cd(1)-N(12)         | 2.323(4)   |
| Cd(1)-N(6)#3        | 2.315(4)   | Cd(1)-O(1)          | 2.327(4)   |
| O(3)#1-Cd(1)-O(2)#2 | 179.81(19) | N(6)#3-Cd(1)-N(12)  | 179.89(19) |
| O(3)#1-Cd(1)-N(6)#3 | 82.45(15)  | O(4)#3-Cd(1)-N(12)  | 84.82(16)  |
| O(2)#2-Cd(1)-N(6)#3 | 97.50(15)  | O(3)#1-Cd(1)-O(1)   | 99.22(15)  |
| O(3)#1-Cd(1)-O(4)#3 | 80.95(15)  | O(2)#2-Cd(1)-O(1)   | 80.59(15)  |
| O(2)#2-Cd(1)-O(4)#3 | 99.24(15)  | N(6)#3-Cd(1)-O(1)   | 85.18(15)  |
| N(6)#3-Cd(1)-O(4)#3 | 95.12(16)  | O(4)#3-Cd(1)-O(1)   | 179.67(16) |
| O(3)#1-Cd(1)-N(12)  | 97.45(16)  | N(12)-Cd(1)-O(1)    | 94.88(16)  |
| O(2)#2-Cd(1)-N(12)  | 82.60(16)  |                     |            |
| Compound 4          |            |                     |            |
| Cd(1)-N(9)          | 2.3246(19) | Cd(1)-N(6)#3        | 2.364(2)   |
| Cd(1)-N(3)          | 2.328(2)   | Cd(1)-O(4)#1        | 2.4600(18) |
| Cd(1)-O(3)#1        | 2.3473(18) | Cd(1)-O(2)#2        | 2.582(2)   |
| Cd(1)-O(1)#2        | 2.3526(18) | N(9)-Cd(1)-O(4)#1   | 90.32(7)   |
| N(9)-Cd(1)-N(3)     | 176.91(7)  | N(3)-Cd(1)-O(4)#1   | 92.44(8)   |
| N(9)-Cd(1)-O(3)#1   | 97.17(7)   | O(3)#1-Cd(1)-O(4)#1 | 54.26(6)   |

|                     |           |                     |           |
|---------------------|-----------|---------------------|-----------|
| N(3)-Cd(1)-O(3)#1   | 85.58(8)  | O(1)#2-Cd(1)-O(4)#1 | 159.19(7) |
| N(9)-Cd(1)-O(1)#2   | 81.64(7)  | N(6)#3-Cd(1)-O(4)#1 | 80.57(7)  |
| N(3)-Cd(1)-O(1)#2   | 95.29(8)  | N(9)-Cd(1)-O(2)#2   | 94.27(7)  |
| O(3)#1-Cd(1)-O(1)#2 | 145.60(7) | N(3)-Cd(1)-O(2)#2   | 84.13(8)  |
| N(9)-Cd(1)-N(6)#3   | 89.35(8)  | O(3)#1-Cd(1)-O(2)#2 | 93.68(6)  |
| N(3)-Cd(1)-N(6)#3   | 89.72(8)  | O(1)#2-Cd(1)-O(2)#2 | 52.43(7)  |
| O(3)#1-Cd(1)-N(6)#3 | 134.22(7) | N(6)#3-Cd(1)-O(2)#2 | 131.10(7) |
| O(1)#2-Cd(1)-N(6)#3 | 80.17(7)  | O(4)#1-Cd(1)-O(2)#2 | 147.95(6) |

Compound 5

|                     |            |                    |            |
|---------------------|------------|--------------------|------------|
| Zn(1)-O(2)#1        | 1.9630(14) | Zn(1)-N(6)         | 2.0324(15) |
| Zn(1)-N(3)#2        | 2.0309(15) | Zn(1)-Cl(1)        | 2.1948(6)  |
| O(2)#1-Zn(1)-N(3)#2 | 104.37(7)  | O(2)#1-Zn(1)-Cl(1) | 127.03(5)  |
| O(2)#1-Zn(1)-N(6)   | 94.06(6)   | N(3)#2-Zn(1)-Cl(1) | 106.37(5)  |
| N(3)#2-Zn(1)-N(6)   | 108.02(7)  | N(6)-Zn(1)-Cl(1)   | 115.42(5)  |

Compound 6

|                     |            |                   |            |
|---------------------|------------|-------------------|------------|
| Zn(1)-O(2)#1        | 1.924(2)   | Zn(1)-O(3)        | 2.003(3)   |
| Zn(1)-N(6)#2        | 1.988(3)   | Zn(1)-N(1)        | 2.032(3)   |
| O(2)#1-Zn(1)-N(6)#2 | 122.07(12) | O(2)#1-Zn(1)-N(1) | 95.00(11)  |
| O(2)#1-Zn(1)-O(3)   | 104.20(12) | N(6)#2-Zn(1)-N(1) | 112.19(12) |
| N(6)#2-Zn(1)-O(3)   | 111.32(11) | O(3)-Zn(1)-N(1)   | 110.77(12) |

Compound 7

|                     |           |                     |           |
|---------------------|-----------|---------------------|-----------|
| Cd(1)-N(1)          | 2.251(16) | Cd(1)-O(3)          | 2.34(2)   |
| Cd(1)-N(6)#1        | 2.283(16) | Cd(1)-O(1W)         | 2.35(2)   |
| Cd(1)-O(2)#2        | 2.322(14) | Cd(1)-O(1)#2        | 2.458(15) |
| N(1)-Cd(1)-N(6)#1   | 119.0(6)  | O(2)#2-Cd(1)-O(1W)  | 87.8(8)   |
| N(1)-Cd(1)-O(2)#2   | 140.7(6)  | O(3)-Cd(1)-O(1W)    | 175.7(8)  |
| N(6)#1-Cd(1)-O(2)#2 | 99.0(6)   | N(1)-Cd(1)-O(1)#2   | 86.7(5)   |
| N(1)-Cd(1)-O(3)     | 99.1(7)   | N(6)#1-Cd(1)-O(1)#2 | 153.5(5)  |
| N(6)#1-Cd(1)-O(3)   | 90.9(7)   | O(2)#2-Cd(1)-O(1)#2 | 54.6(5)   |
| O(2)#2-Cd(1)-O(3)   | 89.2(7)   | O(3)-Cd(1)-O(1)#2   | 91.4(6)   |
| N(1)-Cd(1)-O(1W)    | 85.2(8)   | O(1W)-Cd(1)-O(1)#2  | 89.4(8)   |
| N(6)#1-Cd(1)-O(1W)  | 86.5(8)   |                     |           |

<sup>a</sup>Symmetry transformations used to generate equivalent atoms : #1  $x + 1, y, z$ , #2  $x, y - 1, z$ , #3  $x - 1, y, z$ , #4  $x, y + 1, z$  for compound 1; #1  $-x + 1, -y + 1, -z$ , #2  $-x + 2, y - 1/2, -z + 1/2$ , #3  $x - 1, -y + 3/2, z - 1/2$ , #4  $x, y, z - 1$ , #5  $-x + 1, -y + 1, -z + 1$ , #6  $-x + 2, y + 1/2, -z + 1/2$ , #7  $x, y, z + 1$  for compound 2; #1  $x, y, z + 1$ , #2  $x - 1, y, z$ , #3  $x - 1, y, z + 1$ , #4  $x + 1, y, z - 1$ , #5  $x, y, z - 1$ , #6  $x + 1, y, z$  for compound 3; #1  $-x + 3/2, y - 1/2, -z + 1/2$ , #2  $-x + 1, y + 1, -z + 1/2$ , #3  $x, -y - 1, z - 1/2$ , #4  $-x + 3/2, y + 1/2, -z + 1/2$ , #5  $-x + 1, y - 1, -z + 1/2$ , #6  $x, -y - 1, z + 1/2$  for compound 4; #1  $-x + 1, -y + 1, -z + 1$ , #2  $-x + 2, y + 1/2, -z + 3/2$ , #3  $-x + 2, y - 1/2, -z + 3/2$  for compound 5; #1  $x - 1, y, z$ , #2  $x - 1/2, -y + 3/2, z + 1/2$ , #3  $x + 1/2, -y + 3/2, z - 1/2$ , #4  $x + 1, y, z$  for compound 6; #1  $x + 1, y, z + 1$ , #2  $-x - 1, y + 1/2, -z + 1/2$ , #3  $-x - 1, y - 1/2, -z + 1/2$ , #4  $x - 1, y, z - 1$  for compound 7;

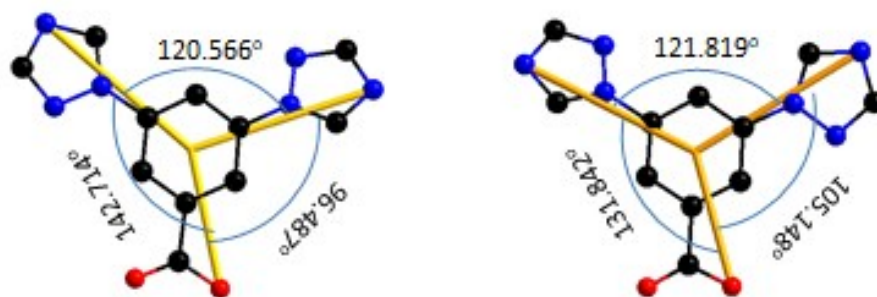

**Figure S1.** The angles between the center of benzene ring and the three terminal coordination atoms in compounds **5** and **6**.

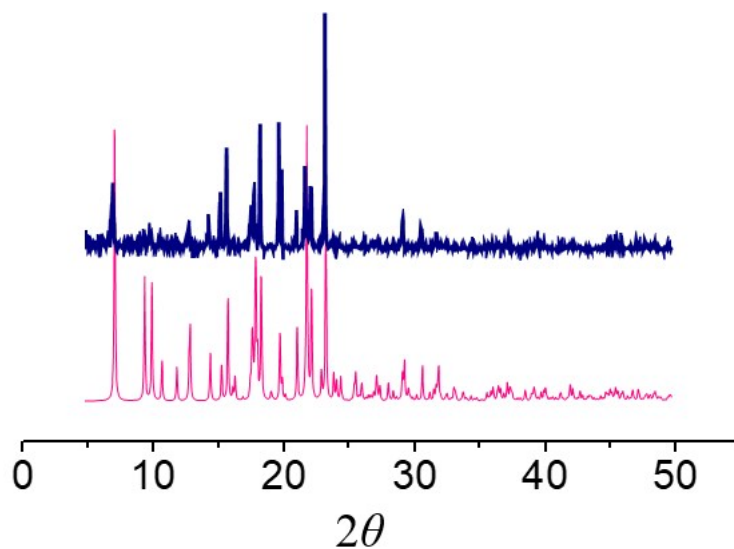

**Figure S2.** The simulated X-ray powder diffraction patterns (lower) and the measured one (upper) of compound **1**.

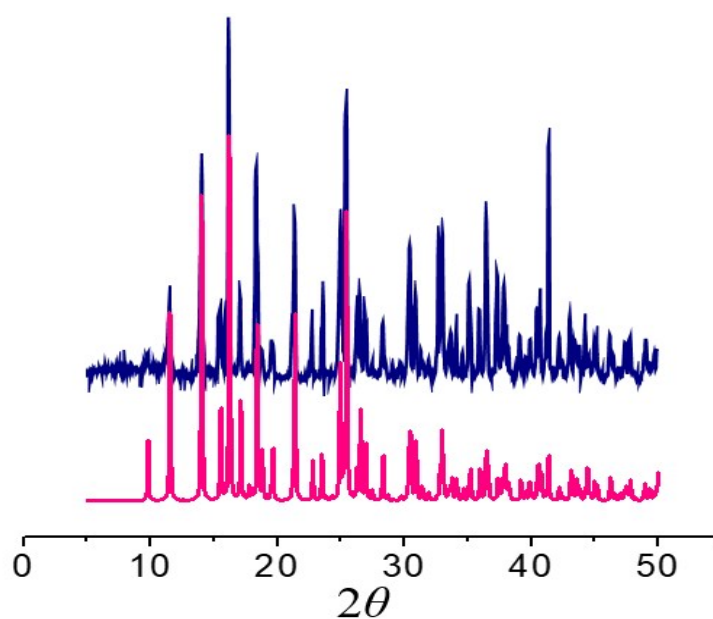

**Figure S3.** The simulated X-ray powder diffraction patterns (lower) and the measured one (upper) of compound **2**.

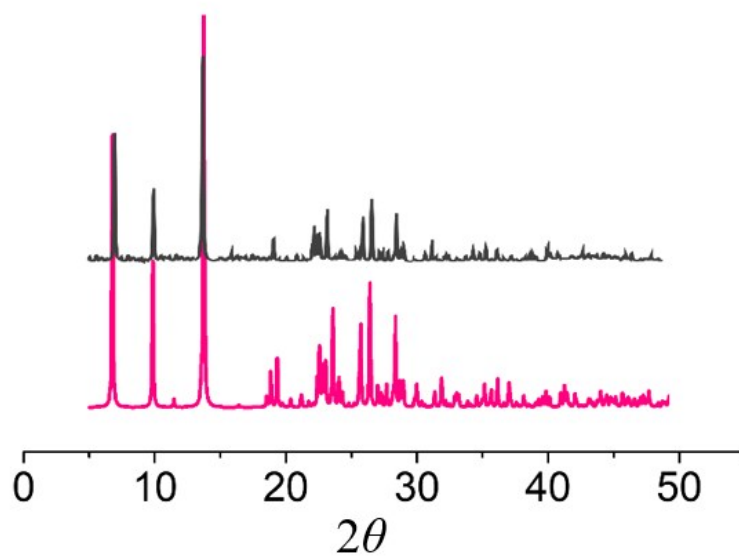

**Figure S4.** The simulated X-ray powder diffraction patterns (lower) and the measured one (upper) of compound 3.

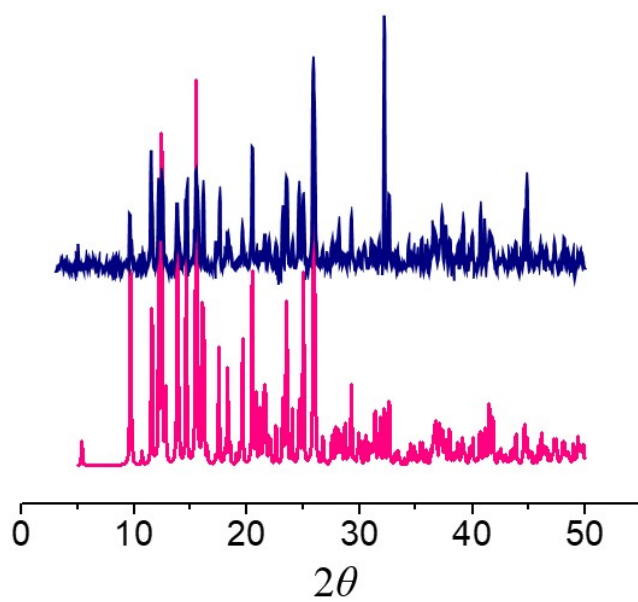

**Figure S5.** The simulated X-ray powder diffraction patterns (lower) and the measured one (upper) of compound 4.

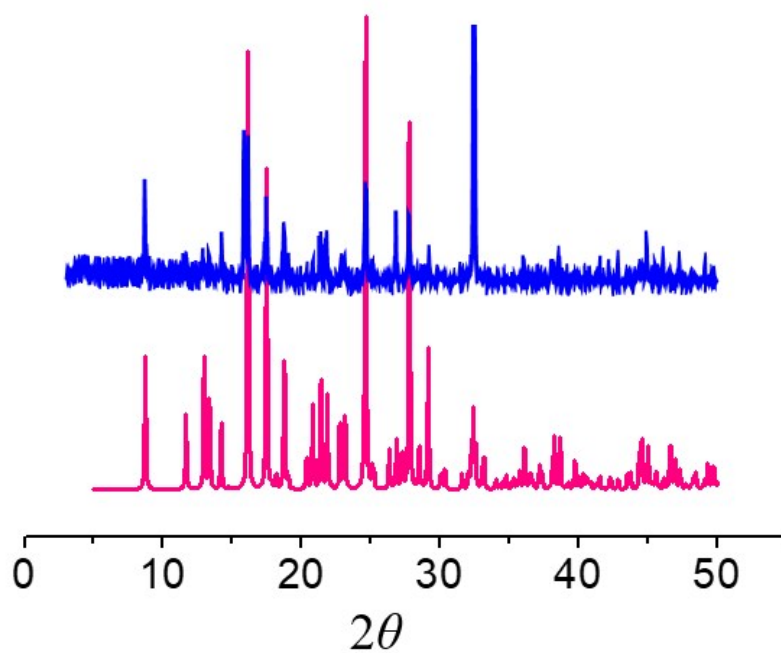

**Figure S6.** The simulated X-ray powder diffraction patterns (lower) and the measured one (upper) of compound **5**.

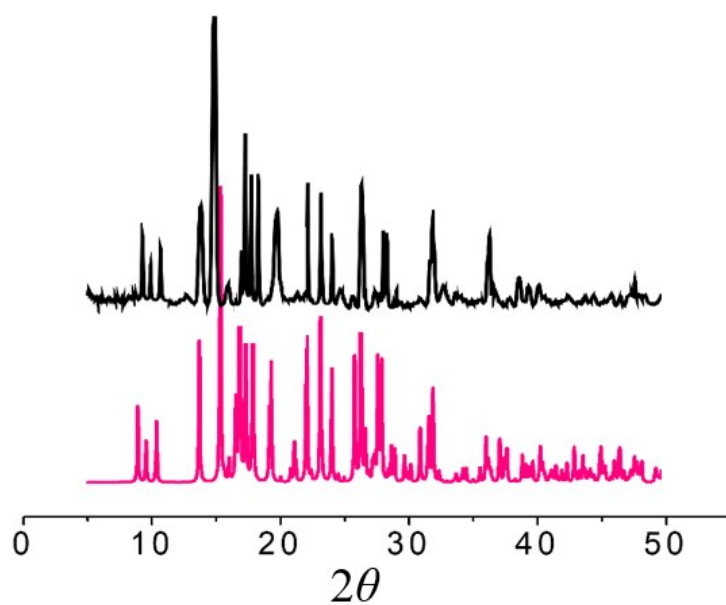

**Figure S7.** The simulated X-ray powder diffraction patterns (lower) and the measured one (upper) of compound **6**.

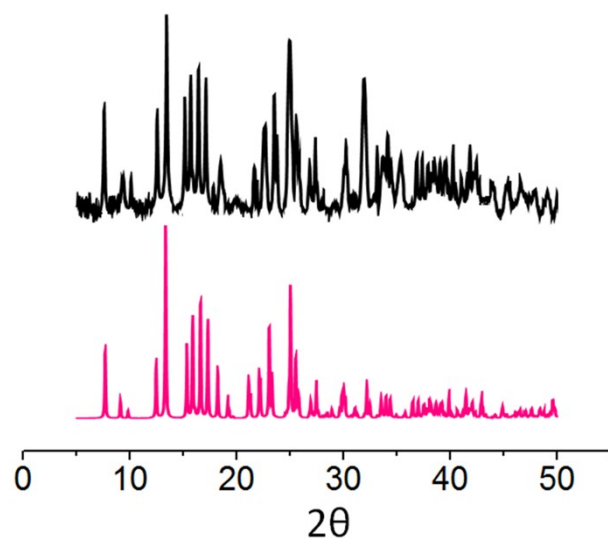

**Figure S8.** The simulated X-ray powder diffraction patterns (lower) and the measured one (upper) of compound 7.

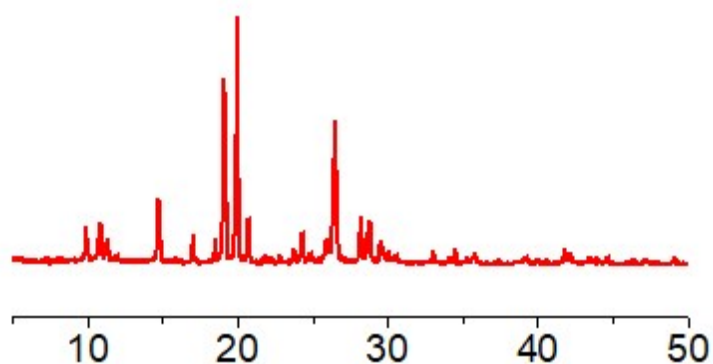

**Figure S9.** The measured XRD of product obtained by reaction of  $\text{Zn}(\text{NO}_3)_2 \cdot 6\text{H}_2\text{O}$  with HDTBA.

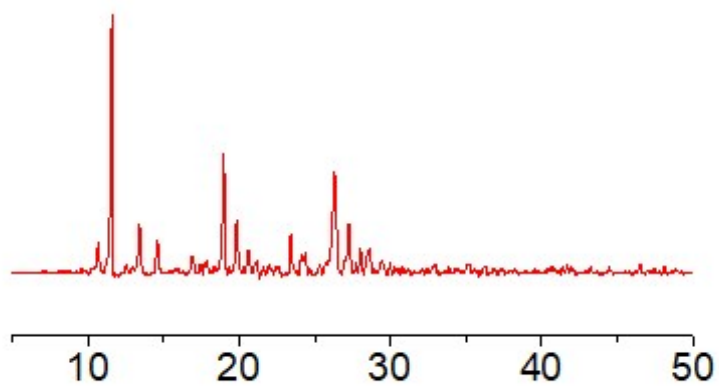

**Figure S10.** The measured XRD of product obtained by reaction of  $\text{ZnCl}_2 \cdot 2\text{H}_2\text{O}$  with HDTBA.

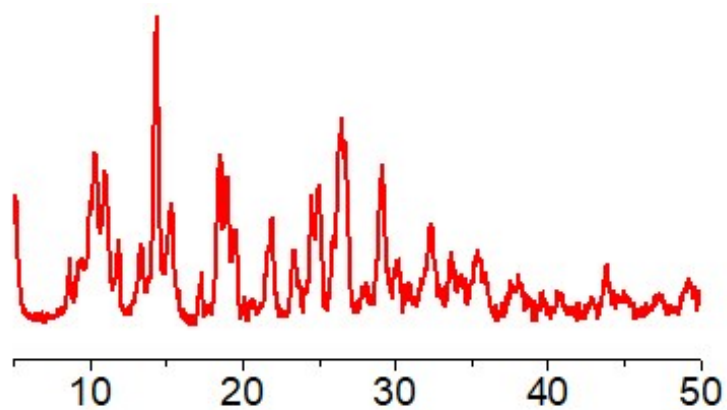

**Figure S11.** The measured PXRD of product obtained by reaction of  $\text{Cd}(\text{NO}_3)_2 \cdot 4\text{H}_2\text{O}$  with HDTBA.

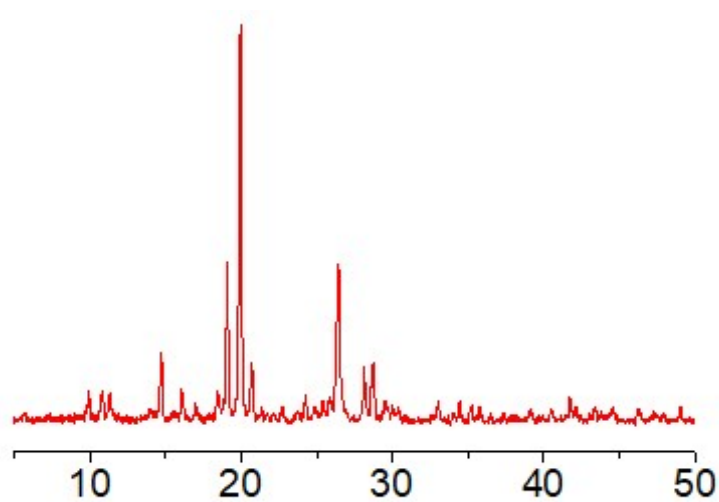

**Figure S12.** The measured PXRD of product obtained by reaction of  $\text{Cd}(\text{NO}_3)_2 \cdot 4\text{H}_2\text{O}$  with HDTBA at the present of  $\text{NH}_3 \cdot \text{H}_2\text{O}$ .

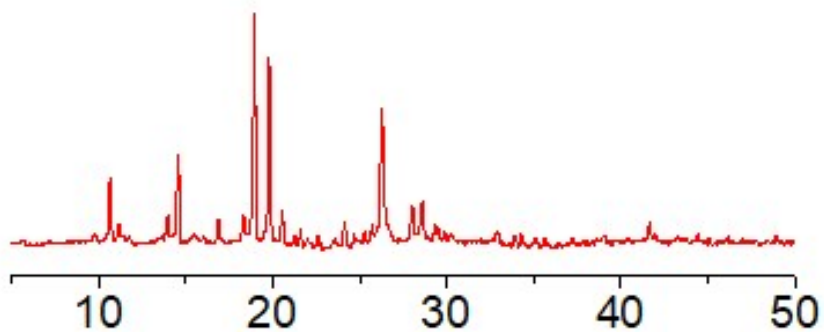

**Figure S13.** The measured PXRD of product obtained by reaction of  $\text{Cd}(\text{ClO}_4)_2 \cdot 6\text{H}_2\text{O}$  with HDTBA.

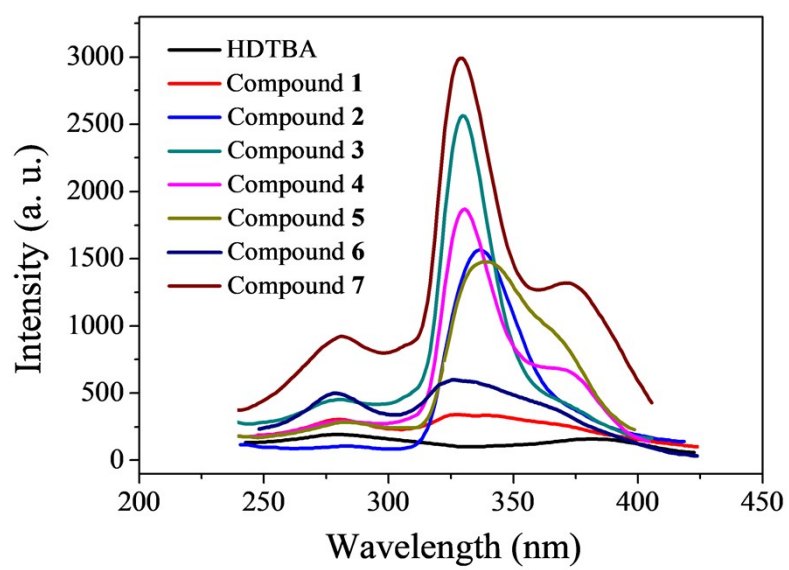

**Figure S14.** The solid-state excitation spectra for compounds 1-7 at room temperature.
